# Supplementary material for: IL-27 Mediates PD-L1 Expression and Release by Human Mesothelioma Cells
Source: MDPI journal article supplement (doi:10.3390/cancers13164011), 2021-08-09
Supplement: s1 [file s1]

SUPPLEMENTARY MATERIAL

SUPPLEMENTARY FIGURE S1

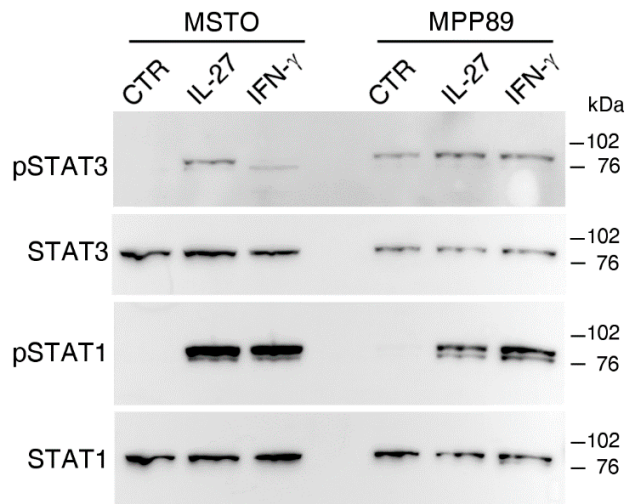

**Supplementary Figure S1.** Western blot analysis of tyrosine phosphorylated (p)STAT1, pSTAT3, total STAT1 and total STAT3 proteins in MSTO and MPP89 cells stimulated for 20 minutes with medium (CTR), IL-27 or IFN- $\gamma$ . Total STATs were used as loading controls.

Stimulation with IFN- $\gamma$  predominantly induces STAT1 phosphorylation in MM cell lines in a similar manner as IL-27.

## SUPPLEMENTARY FIGURE S2

**A**

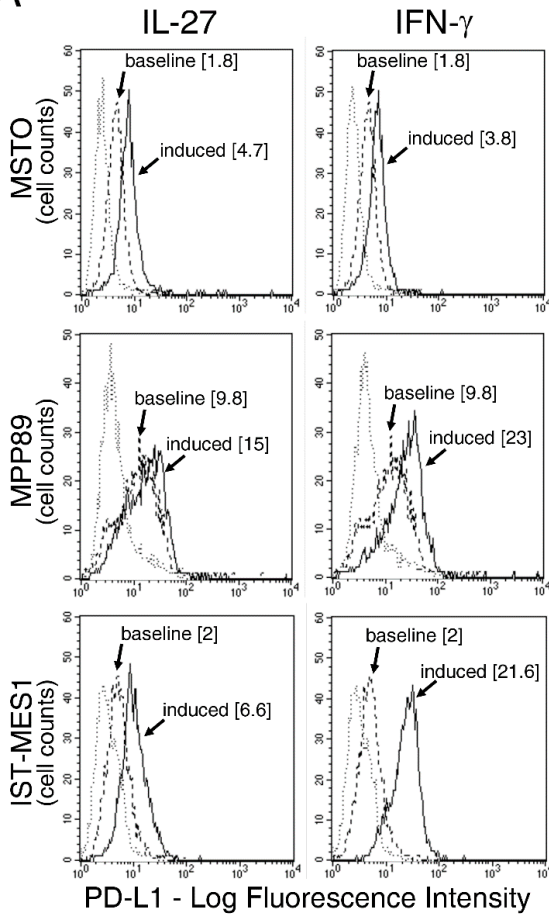

**B**

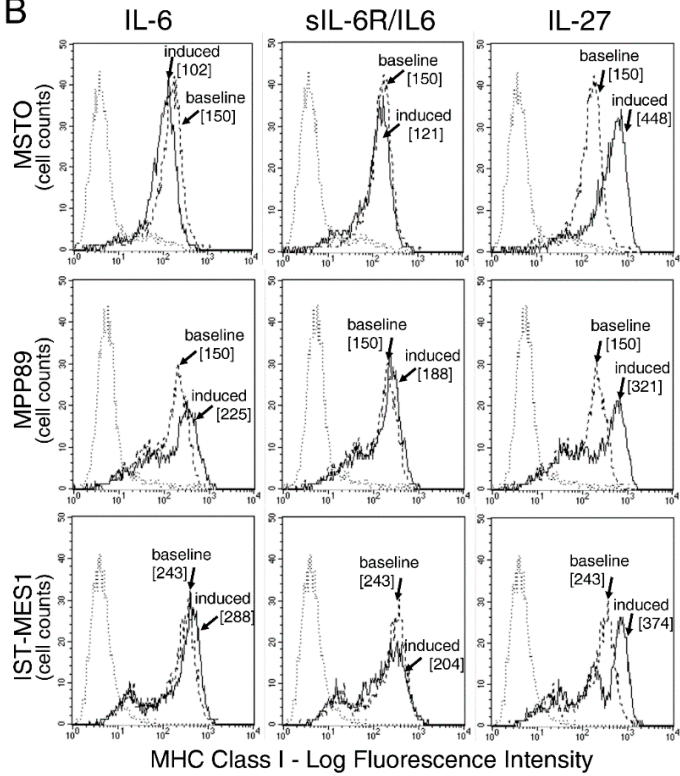

**Supplementary Figure S2.** Both IL-27 and IFN- $\gamma$  upregulate PD-L1 molecule expression by malignant mesothelioma (MM) cells and IL-27 upregulates MHC Class I molecule expression by MM cells. **(A)** Flow cytometry analysis of membrane PD-L1 expression in MSTO, MPP89 and IST-MES1 cell lines cultured with medium alone (baseline), IL-27 or IFN- $\gamma$  (induced). Dotted line shows isotype-matched Ig control. Numbers in brackets represent Median Fluorescence Intensity (MFI) values calculated as median anti-PD-L1 mAb minus median Ig control. Data are representative of two independent experiments yielding similar results. **(B)** Flow cytometry analysis of membrane MHC Class I expression in MSTO, MPP89 and IST-MES1 MM cell lines cultured with medium alone (baseline), IL-6, sIL-6R/IL-6 chimera or IL-27 (induced). Dotted lines show isotype-matched Ig control. Numbers in brackets represent Median Fluorescence Intensity (MFI) values calculated as

median anti-MHC Class I W6/32 mAb minus median Ig control. Data are representative of two independent experiments yielding similar results.

### SUPPLEMENTARY FIGURE S3

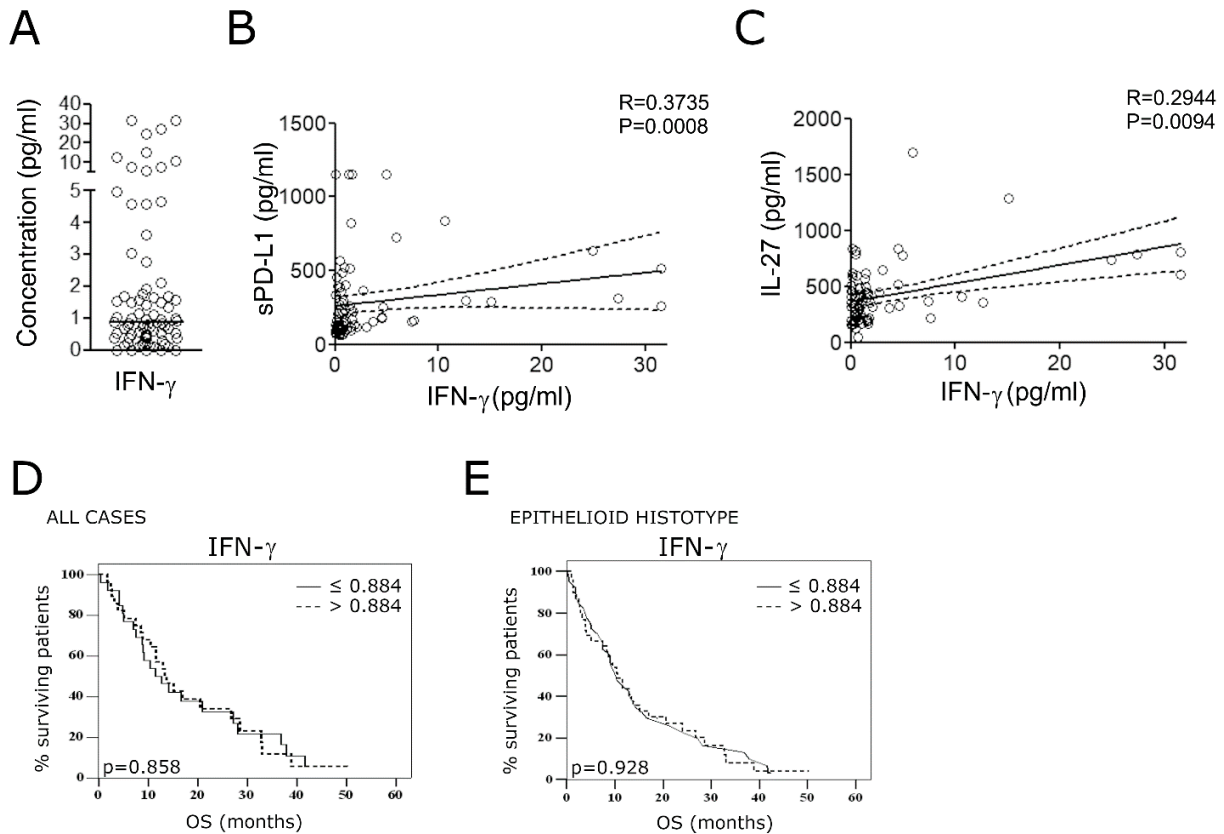

**Supplementary Figure S3.** Analysis of IFN- $\gamma$  levels in MM pleural exudates. Samples were re-assessed by a high sensitivity ELISA assay (Quantikine HS ELISA, code HSDIF0, R&D Systems, Minneapolis, MN). With this assay, the values obtained were all within the standard curve range, thus making the results reliable for statistical evaluation. (A) Concentration (pg/ml) of IFN- $\gamma$  in pleural effusion. Bar indicates median value. (B) Correlation between IFN- $\gamma$  and sPD-L1 levels in MM pleural fluids. (C) Correlation between IFN- $\gamma$  and IL-27 in the same cohort. Spearman's rank correlation coefficient (R) and p value (P) are indicated. Lines represent the best fit linear regression analysis with the 95% confidence interval. (D, E) Kaplan-Meier curves assessing overall survival according to IFN- $\gamma$

concentrations in the pleural effusion, as dichotomized around the median value. Analyses with respect to all cases (n=77) (D) and the subgroup with the epithelioid histotype (n=55) (E) are shown.

SUPPLEMENTARY FIGURE S4

Densitometric analyses of relevant bands in Western blot 4.1

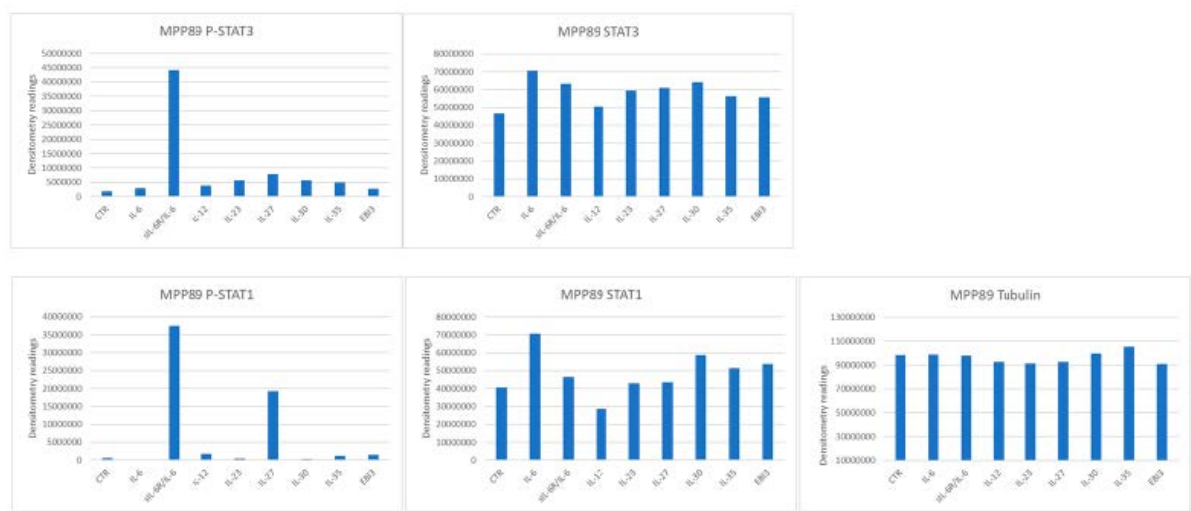

Densitometric analyses of relevant bands in western blot 4.2

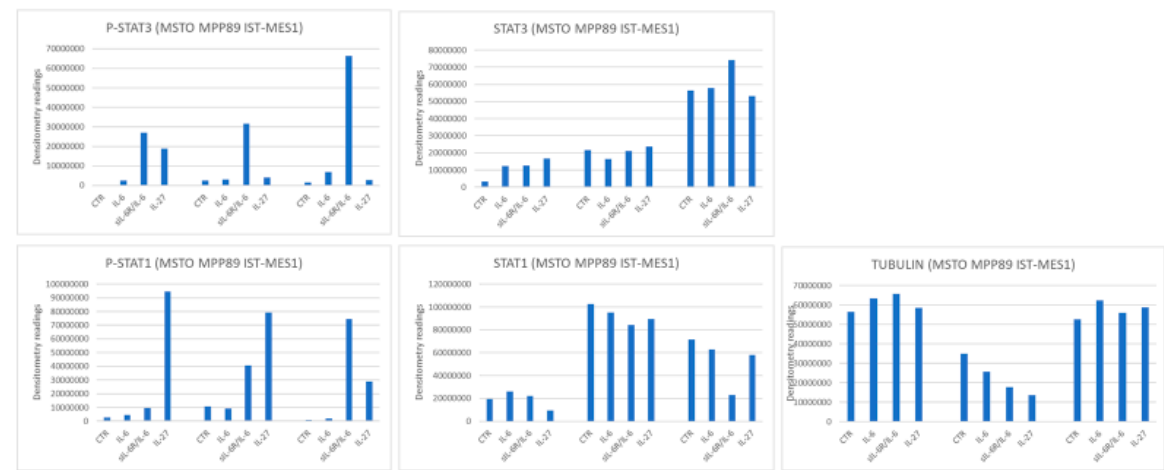

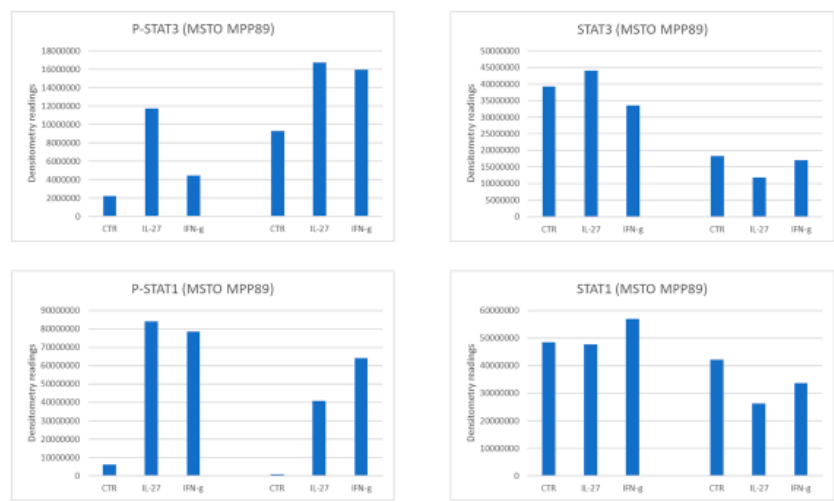

Whole Western blot images, cropped in figure:

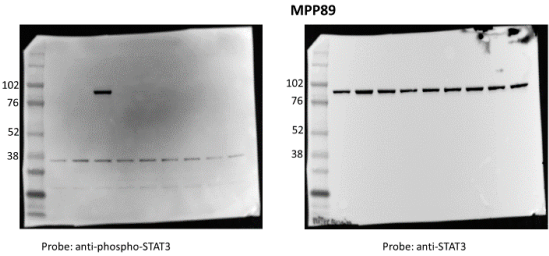

4.4 Carbotti G et al. Whole Western blot images, cropped in figure:

4.5

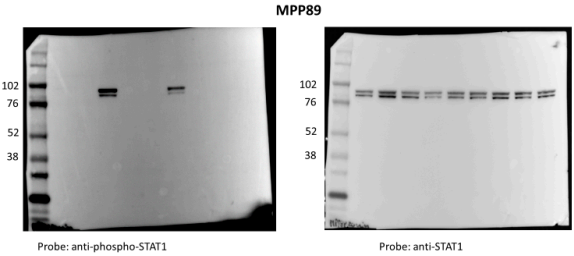

Markers: GE RPN800E

Carbotti G et al. Whole Western blot images, cropped in figure:

4.6 Carbotti G et al. Whole Western blot images, cropped in figure:

4.7

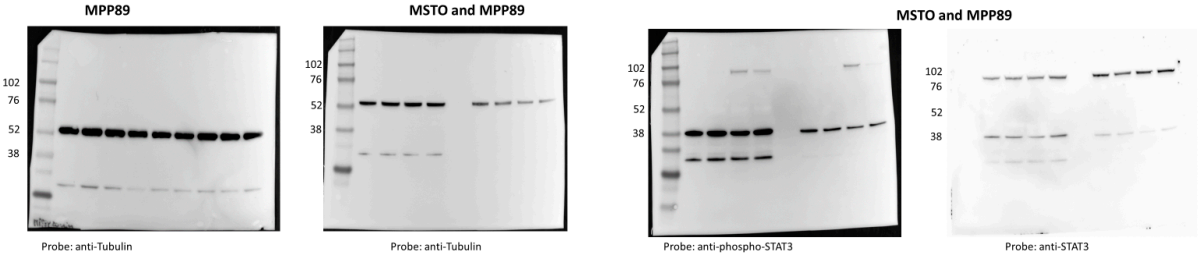

Carbotti G et al. Whole Western blot images, cropped in figure:

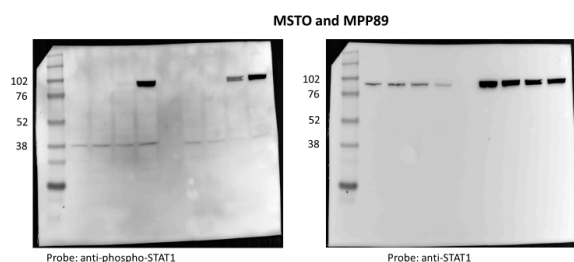

4.8 Carbotti G et al. Whole Western blot images, cropped in figure:

4.9

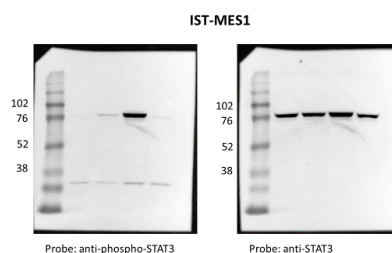

Carbotti G et al. Whole Western blot images, cropped in figure:

4.10 Carbotti G et al. Whole Western blot images, cropped in figure:

4.11

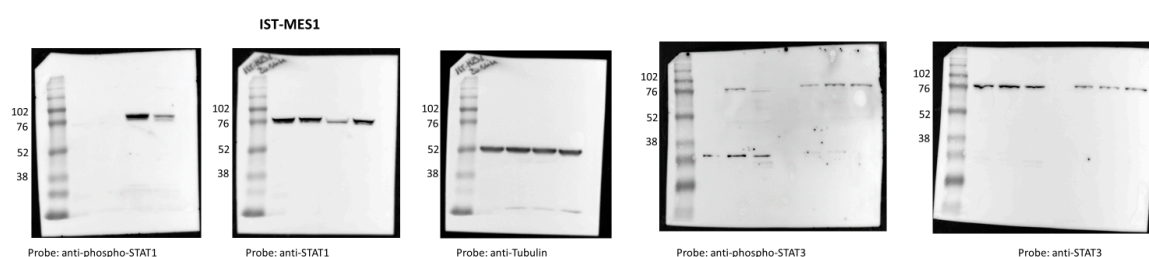

Carbotti G et al. Whole Western blot images, cropped in figure:

4.12

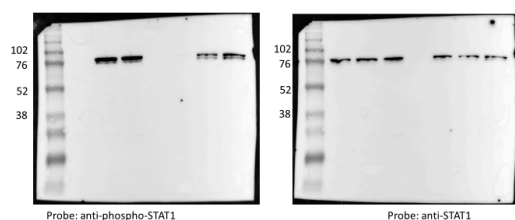

**Supplementary Figure S4.** Densitometric analyses of relevant bands (panels 4.1 to 4.3) and whole Western blot images (panels 4.4 to 4.12), relative to the figures indicated in each panel.

**SUPPLEMENTARY TABLE S1. qRT-PCR primers.**

| <b>Gene</b>          | <b>Forward primer</b>      | <b>Reverse primer</b>  |
|----------------------|----------------------------|------------------------|
| <i>GAPDH</i>         | GAAGGTGAAGGTCGGAGT         | CATGGGTGGAATCATATTGGAA |
| <i>POLR2A</i>        | GACAATGCAGAGAAGCTGG        | GCAGGAAGACATCATCATCC   |
| <i>CD274 (PD-L1)</i> | TGCCGACTACAAGCGAATTACTG    | CTGCTTGTCCAGATGACTTCGG |
| <i>LGALS3 (GAL3)</i> | CCATCTTCTGGACAGCCAAGTG     | TATCAGCATGCGAGGCACCACT |
| <i>GBP1</i>          | TAGCAGACTTCTGTTCTTCTACATCT | CCACTGCTGATGGCATTGACGT |

**SUPPLEMENTARY TABLE S2. Patient characteristics.** The cohort (n=77) was obtained from the “Alessandria Biobank-Centro Raccolta Materiali Biologici”, Department of Integrated Activities Research and Innovation, Azienda Ospedaliera SS. Antonio e Biagio e Cesare Arrigo, Alessandria, Italy.

|                      | <b>n (%)</b> |
|----------------------|--------------|
| Age (around median)  |              |
| ≤74y                 | 39 (50.6)    |
| >74y                 | 38 (49.4)    |
| Gender               |              |
| Male                 | 56 (72.7)    |
| Female               | 21 (27.3)    |
| Histology            |              |
| Epithelioid          | 55 (71.4)    |
| Sarcomatoid          | 12 (15.6)    |
| Biphasic             | 10 (13.0)    |
| Stage                |              |
| I                    | 1 (1.3)      |
| II                   | 17 (22.0)    |
| III-IV               | 35 (45.5)    |
| Unknown              | 24 (31.2)    |
| ECOG                 |              |
| 0                    | 11 (14.3)    |
| 1                    | 6 (7.8)      |
| ≥2                   | 5 (6.5)      |
| Unknown              | 55 (71.4)    |
| Exposure to asbestos |              |
| Environmental        | 29 (37.7)    |
| Professional         | 29 (37.7)    |
| Unknown              | 19 (24.6)    |
| Smoking history      |              |
| Never smoked         | 28 (36.4)    |

|                 |           |
|-----------------|-----------|
| Current smoker  | 5 (6.5)   |
| Ex-smoker       | 25 (32.4) |
| Unknown         | 19 (24.7) |
| Therapy         |           |
| No              | 22 (28.6) |
| At least 1 line | 48 (62.3) |
| Unknown         | 7 (9.1)   |
